# Supplementary material for: Six new metal–organic frameworks with multi-carboxylic acids and imidazole-based spacers: syntheses, structures and properties
Source: Royal Society of Chemistry journal article supplement (doi:10.1039/c1dt11130b), 2011-01-01
Supplement: c1dt11130b.pdf [file c1dt11130b.pdf]

## Six new metal-organic frameworks with multi-carboxylic acids and imidazole-based spacer: syntheses, structures and properties

Feng Wang,<sup>‡a</sup> Xiaohuan Ke,<sup>‡a</sup> Jinbo Zhao,<sup>a</sup> Kejian Deng,<sup>b</sup> Xiaoke Leng,<sup>a</sup> Zhengfang Tian,<sup>c</sup> Lili Wen<sup>\*a</sup> and Dongfeng Li<sup>\*a</sup>

<sup>a</sup> Key Laboratory of Pesticide & Chemical Biology of Ministry of Education, College of Chemistry, Central China Normal University, Wuhan, 430079, P. R. China. Fax: +86 27 67867232; Tel: +86 27 67862900; E-mail: wenlili@mail.ccnu.edu.cn (L. Wen), dfli@ccnu.edu.cn (D. Li)

<sup>b</sup> Key Laboratory of Catalysis and Materials Science of the State Ethnic Affairs Commission & Ministry of Education, South-Central University for Nationalities, Wuhan 430074, P. R. China.

<sup>c</sup> Huanggang Normal Univ, Coll Chem&Appl Chem, Huangguang 438000, P. R. China.

<sup>‡</sup>These authors contributed equally to this work.

**Table S1** Selected bond lengths (Å) and bond angles (deg) for **1-6**

| <b>1<sup>a</sup></b> |            |            |            |             |           |             |            |             |            |
|----------------------|------------|------------|------------|-------------|-----------|-------------|------------|-------------|------------|
| Cu1–O1               | 2.927(2)   | Cu1–O2     | 1.9204(19) | Cu1–N4A     | 1.9719    | Cu1–O1B     | 2.927(2)   | Cu1–O2B     | 1.9204(19) |
| Cu1–N4C              | 1.9719     | Cu2–O3     | 1.9327(19) | Cu2–N1      | 1.971(2)  | Cu2–O5D     | 2.680(2)   | Cu2–O5E     | 2.680(2)   |
| Cu2–O3F              | 1.9327(19) | Cu2–N1F    | 1.971(2)   | O1–Cu1–O1B  | 180.00    | O2–Cu1–O2B  | 180.00     | N4A–Cu1–N4C | 180.00     |
| O2B–Cu1–N4C          | 90.20      | O2–Cu1–N4C | 89.80      | O1B–Cu1–N4A | 98.15     | O3–Cu2–O3F  | 180.00     | N1–Cu2–N1F  | 180.00     |
| O5D–Cu2–O5E          | 180.00     | O3–Cu2–N1  | 88.76(9)   | O3F–Cu2–N1  | 91.25(9)  | O5E–Cu2–N1  | 87.90(8)   |             |            |
| <b>2<sup>b</sup></b> |            |            |            |             |           |             |            |             |            |
| Cu1–O1               | 2.501(2)   | Cu1–O2     | 2.024(2)   | Cu1–N1      | 2.014(3)  | Cu1–O1A     | 2.501(2)   | Cu1–O2A     | 2.024(2)   |
| Cu1–N1A              | 2.014(3)   | O1–Cu1–O1A | 134.85(7)  | O2–Cu1–O2A  | 98.66(9)  | N1–Cu1–N1A  | 103.88(12) | O1A–Cu1–O2  | 93.54(8)   |
| <b>3<sup>c</sup></b> |            |            |            |             |           |             |            |             |            |
| Zn1–O1               | 1.947(5)   | Zn1–N4     | 2.006(5)   | Zn1–O9B     | 1.968(5)  | Zn1–N8A     | 2.038(6)   | Zn2–O4      | 1.935(4)   |
| Zn2–O6               | 1.955(4)   | Zn2–N5     | 2.013(5)   | Zn2–N1C     | 2.035(6)  | O1–Zn1–N4   | 119.5(2)   | O1–Zn1–O9B  | 101.4(2)   |
| O1–Zn1–N8A           | 101.1(2)   | O9B–Zn1–N4 | 117.4(2)   | N4–Zn1–N8A  | 102.7(2)  | O9B–Zn1–N8A | 114.1(2)   | O4–Zn2–O6   | 99.68(18)  |
| O4–Zn2–N5            | 122.7(2)   | O4–Zn2–N1C | 107.9(2)   | O6–Zn2–N5   | 109.3(2)  | O6–Zn2–N1C  | 114.9(2)   | N1C–Zn2–N5  | 103.0(2)   |
| <b>4<sup>d</sup></b> |            |            |            |             |           |             |            |             |            |
| Ni1–O1               | 2.119(2)   | Ni1–O5     | 2.118(2)   | Ni1–O7      | 1.988(2)  | Ni1–O1A     | 2.119(2)   | Ni1–O5A     | 2.118(2)   |
| Ni1–O7A              | 1.988(2)   | Ni2–O1     | 2.125(2)   | Ni2–O1W     | 2.150(2)  | Ni2–O8      | 2.018(2)   | Ni2–N1      | 2.050(3)   |
| Ni2–O5A              | 2.101(2)   | Ni2–N4A    | 2.024(3)   | O1–Ni1–O1A  | 180.00    | O5–Ni1–O5A  | 180.00     | O7–Ni1–O7A  | 180.00     |
| O1–Ni1–O5            | 102.01(8)  | O1–Ni1–O7  | 89.48(8)   | O1W–Ni2–O8  | 168.67(9) | O1–Ni2–N1   | 167.22(10) | N4A–Ni2–O5A | 172.84(10) |
| <b>5<sup>e</sup></b> |            |            |            |             |           |             |            |             |            |
| Ni1–O1               | 2.070(5)   | Ni1–O2     | 2.095(5)   | Ni1–O3      | 2.097(5)  | Ni1–N1      | 2.093(5)   | Ni1–N5      | 2.093(5)   |
| Ni1–N3A              | 2.108(5)   | N1–Ni–N3A  | 173.3(2)   | O1–Ni1–O2   | 90.79(18) | O3–Ni1–N5   | 88.76(19)  | O2–Ni1–N1   | 86.47(19)  |
| <b>6<sup>f</sup></b> |            |            |            |             |           |             |            |             |            |
| Cd1–O1               | 2.341(2)   | Cd1–O9     | 2.254(4)   | Cd1–O1A     | 2.341(2)  | Cd1–O3B     | 2.396(2)   | Cd1–O4B     | 2.455(2)   |
| Cd1–O3C              | 2.396(2)   | Cd1–O4C    | 2.455(2)   | O1–Cd1–O1A  | 158.93(8) | O3B–Cd1–O4B | 53.87(7)   | O3C–Cd1–O4C | 53.87(7)   |
| O3C–Cd1–O9           | 82.88(5)   | O4B–Cd1–O9 | 134.89(5)  | O3C–Cd1–O4B | 139.86(7) |             |            |             |            |

<sup>a</sup>Symmetry codes for **1**: (A)  $-x, 1/2+y, 3/2-z$ ; (B)  $-x, 1-y, 3-z$ ; (C)  $x, 1/2-y, 3/2+z$ ; (D)  $x, y, 1+z$ ; (E)  $1-x, 1-y, 1-z$ ; (F)  $1-x, 1-y, 2-z$

<sup>b</sup>Symmetry codes for **2**: (A)  $x, 3/2-y, 1/2-z$

<sup>c</sup>Symmetry codes for **3**: (A)  $3/2-x, -1/2+y, 1-z$ ; (B)  $3/2+x, 1/2-y, -z$ ; (C)  $3-x, 1-y, -1+z$

<sup>d</sup>Symmetry codes for **4**: (A)  $2-x, -y, 1-z$

<sup>e</sup>Symmetry codes for **5**: (A)  $-1+x, -1+y, z$

<sup>f</sup>Symmetry codes for **6**: (A)  $-x, y, -1/2-z$ ; (B)  $-x, -y, -z$ ; (c)  $x, -y, -1/2+z$ .

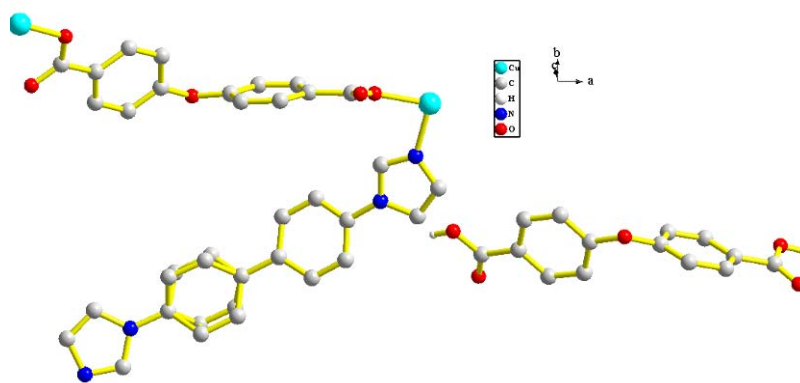

(a)

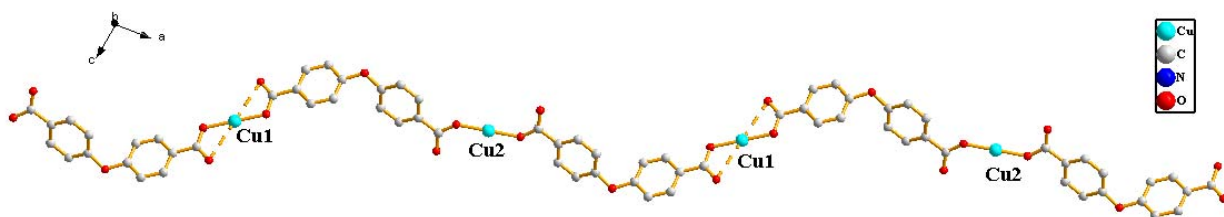

(b)

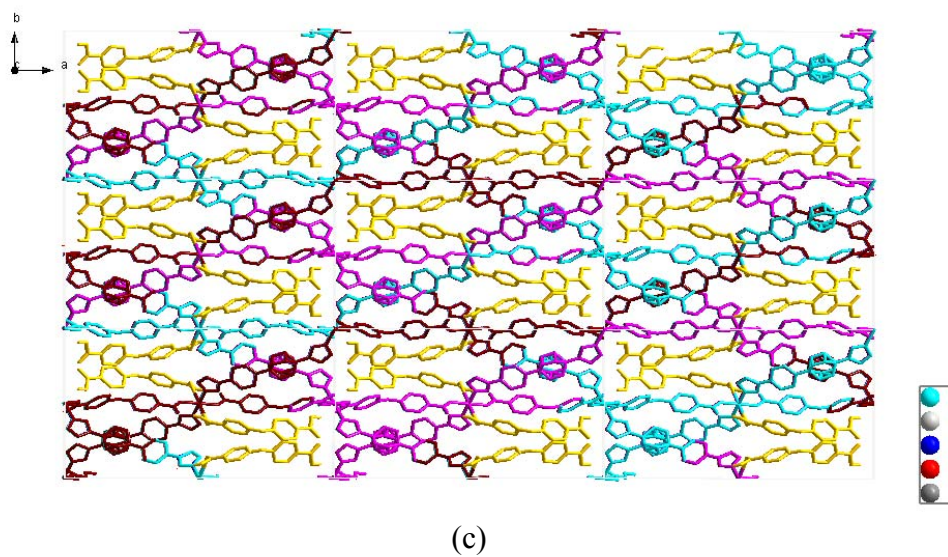

**Fig. S1** (a) The asymmetric unit in **1**, (b) one-dimensional chain constructed from  $\text{obba}^{2-}$  and  $\text{Cu}^{2+}$ , (c) 3-fold parallel interpenetration of the 3D nets in **1**.

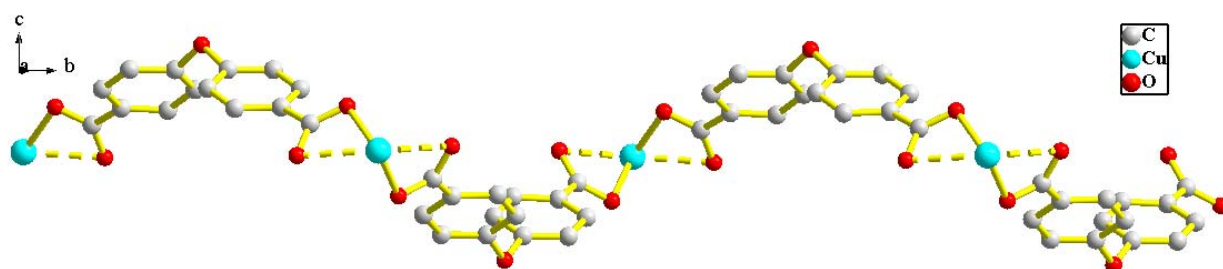

**Fig. S2** The one-dimensional chain constructed from  $\text{obba}^{2-}$  and  $\text{Cu}^{2+}$  in **5**.

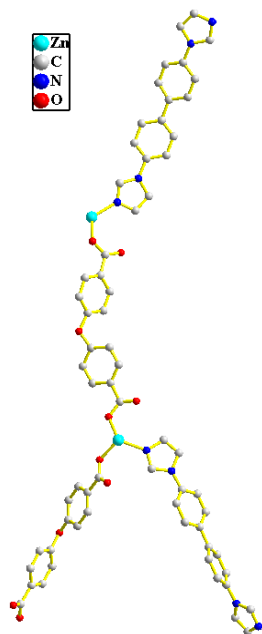

**Fig. S3** The asymmetric unit in **6**.

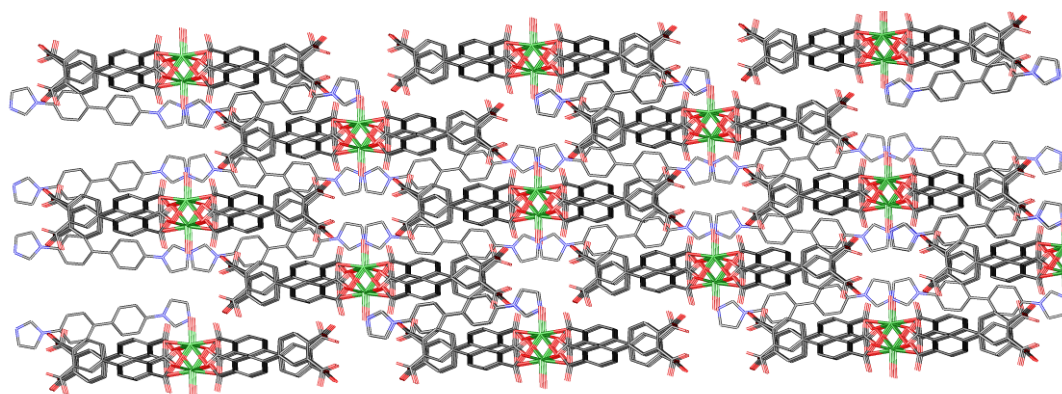

**Fig. S4** The bimbo moieties are located at an inversion center, which are included between the 1D chains in **6**.

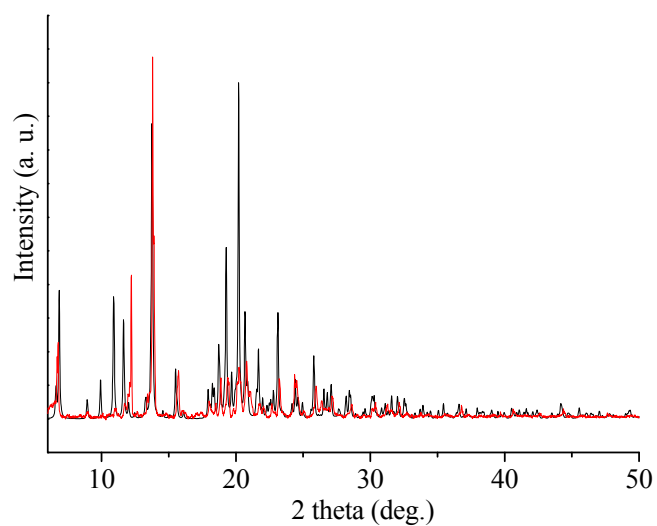

**Fig. S5.** X-ray power diffraction diagram of the simulated spectra from single crystal data of **1** (black) and compound **1** (red).

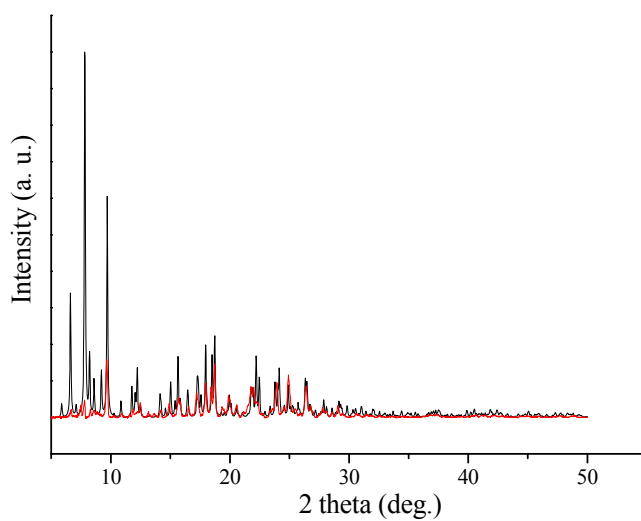

**Fig. S6.** X-ray power diffraction diagram of the simulated spectra from single crystal data of **2** (black) and compound **2** (red).

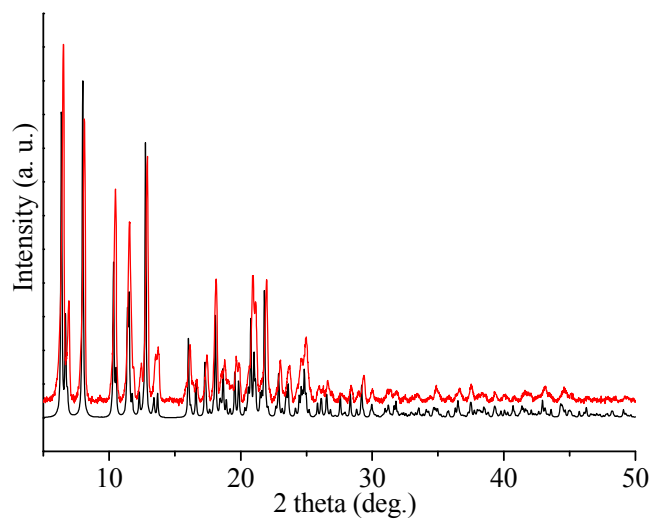

**Fig. S7.** X-ray power diffraction diagram of the simulated spectra from single crystal data of **3** (black) and compound **3** (red).

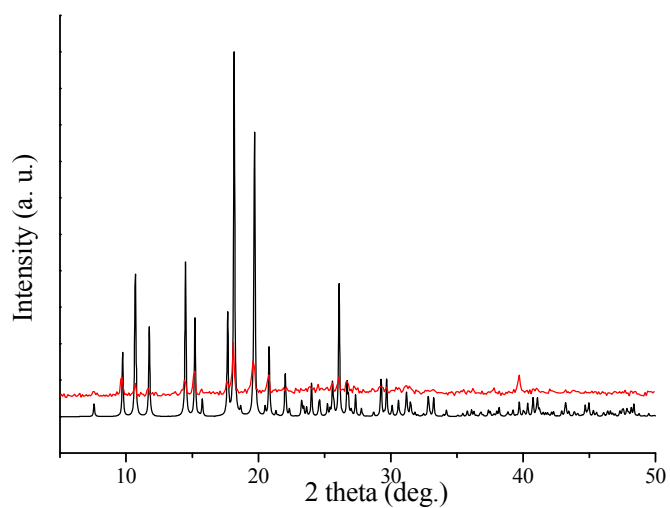

**Fig. S8.** X-ray power diffraction diagram of the simulated spectra from single crystal data of **4** (black) and compound **4** (red).

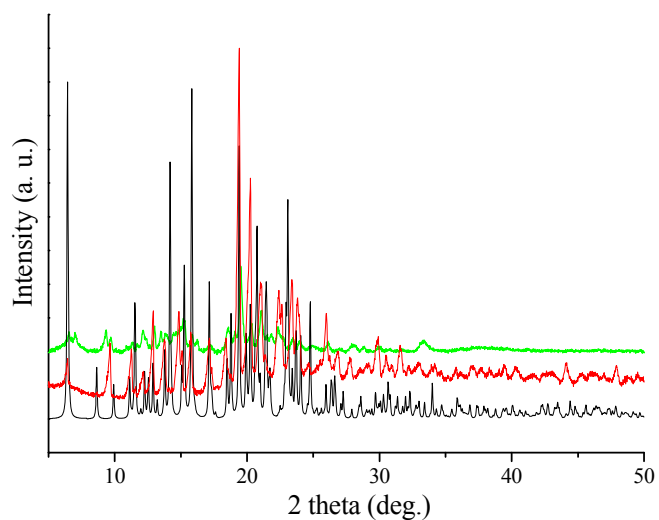

**Fig. S9.** X-ray power diffraction diagram of the simulated spectra from single crystal data of **5** (black), compound **5** (red), **5** after photocatalysis process (green).

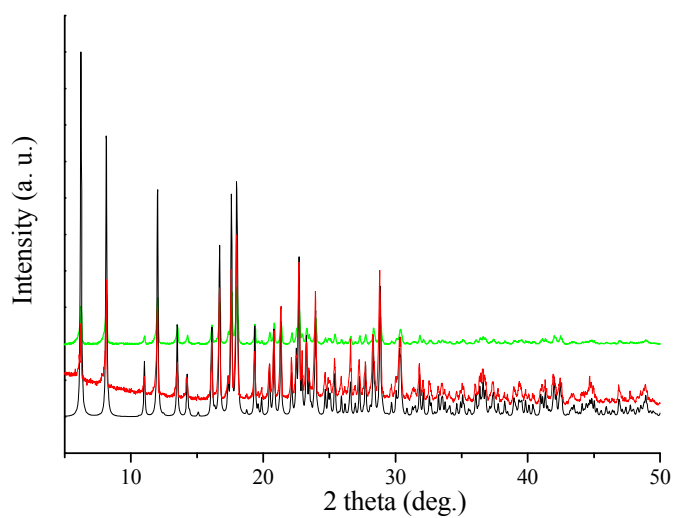

**Fig. S10.** X-ray power diffraction diagram of the simulated spectra from single crystal data of **6** (black), compound **6** (red), **6** after photocatalysis process (green).



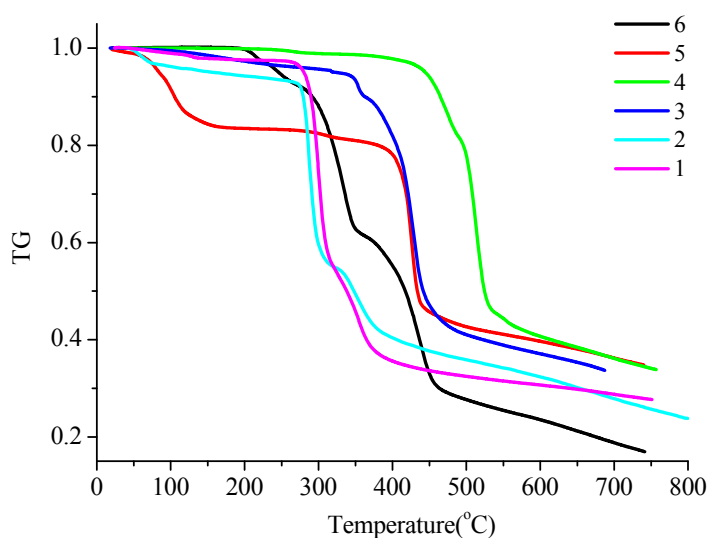

**Fig. S11** TG curves of compounds **1-6**.

Both Compounds **1** and **2** are stable up to 265 °C where the organic groups start to decompose. Compounds **3** and **4** also have demonstrated high thermal stabilities, which are stable up to 344 and 410 °C, respectively, where the framework structures begin to collapse. For **5**, the weight loss of 17.10 % below 185 °C (calcd □ 17.73 %) corresponds to the loss of six coordinated aqua molecules, two free water molecules and two DMF guest moieties per formula. A plateau region is observed for **5** from 185 to 400 °C and consecutive decompositions suggest the total destruction of the framework. In addition, compound **6** is stable up to 200 °C.
